# Supplementary material for: The Transcription Factors AcuK and AcuM Influence Siderophore Biosynthesis of Aspergillus fumigatus
Source: MDPI journal article supplement (doi:10.3390/jof10050327), 2024-04-30
Supplement: s1 [file s1]

## SUPPLEMENTARY MATERIAL

**Table S1:** Strains used in this study.

| Strain        | Description                                                           | Reference  |
|---------------|-----------------------------------------------------------------------|------------|
| A1160+        | CEA10; $\Delta akuB^{ku80}::pyrG^{-}zeo$ , $pyrG::pyrG^{Af}$ ; MAT1-1 | [39]       |
| $\Delta acuM$ | A1160+; $acuM::hph$                                                   | [38]       |
| $\Delta acuK$ | A1160+; $acuK::hph$                                                   | [38]       |
| $\Delta acuE$ | A1160+; $acuE::hph$                                                   | This study |
| AfS77         | ATCC4664; $\Delta akuA::loxP$                                         | [41]       |
| $\Delta sidA$ | AfS77, $\Delta sidA::six$                                             | [7]        |

**Table S2:** Primers used in this study.

| Primer | 5'-3' Sequence                           |
|--------|------------------------------------------|
| oPC48  | TAAATTGCATTTTGGATCTTGAAT                 |
| oPC49  | TAGTTCTGTTACCGAGCCGGgttgatattgtcttttgcaa |
| Hph-fw | ccggctcggtaacagaactaACGGCGTAACCAAAAGTCAC |
| Hph-rv | gggagcatatcggtcagagcTCTTGACGACCGTTGATCTG |
| oPC50  | GCTCTGAACGATATGCTCCCcctgcaagattgtgagcgtg |
| oPC51  | ACTGGGATGTGGTGCGGGGCGGAG                 |
| oPC52  | CATCGGAACAAGTCGGACAAG                    |
| oPC53  | GAGATATTCAAGAAGTTGTAGAGGATG              |

**Table S3:** Primers used for the amplification of the digoxigenin-labelled probes for Northern- and Southern blot analysis.

| Probe              | Gene         | 5'-3' Sequence                                                 |
|--------------------|--------------|----------------------------------------------------------------|
| <i>hapX</i>        | AFUA_5G03920 | TCG GTG GAA AGA AGT GCC<br>CGA CGA TGT ATT GTT ATT GG          |
| <i>mirB</i>        | AFUA_3G03640 | AAGCCGAGAAAAAGGGGG<br>AACCCAGATGAAGCCCAG                       |
| <i>mirD</i>        | AFUA_3G03440 | TGATGCAGGGGAAATGCTGC<br>TGATATAGGGAGAGGAGGTAAAGGCG             |
| <i>sidA</i>        | AFUA_2G07680 | AACTACCTCCACCAGAAG<br>GAACGGCAATGTTGTAAG                       |
| <i>sit1</i>        | AFUA_7G06060 | AGAACCAACCATGAACATGGCGATGCAC<br>TTACGGATGATTTATCATCAATCTCCTCCG |
| <i>sidF</i>        | AFUA_3G03400 | CCT CAT CCC TAT CTC ACC<br>AGT TTT GAG CGA GAG GGG             |
| <i>ftrA</i>        | AFUA_5G03800 | ATGGCAAAGACGTATTTGC<br>TCAGACAAGGGATGCTC                       |
| <i>facA</i>        | AFUA_4G11080 | TTCGTCGAAGGTCGCTTGAA<br>CTCATCGACTCAGGAGCGAC                   |
| <i>acoA</i>        | AFUA_6G12930 | CAG CGT CCT CTC ACA TAC<br>GCA AGA ACC GAT CAG ACC             |
| <i>acuE</i>        | AFUA_6G03540 | CAATGCTCTGAATGCGGACG<br>GGTGCTTGCGGAACCTTCTTG                  |
| <i>acuN</i>        | AFUA_6G06770 | TTGGCCCTGCTCTCATCAAG<br>TGACGTCGGCCTTGTAGAAC                   |
| <i>acuD</i>        | AFUA_4G13510 | TCTGAAGCCGCAACACTCAT<br>TCCAGTTGAAGGATGGCGAC                   |
| <i>acuF</i>        | AFUA_6G07720 | GTCTTCGACCCTATCAGCCG<br>TTTAGCAGCTCAGAGGGCAC                   |
| <i>acuG</i>        | AFUA_4G11310 | ACATTGCTCTGCCATGCTCT<br>TTCATGTTGGGGTGGGTCAG                   |
| 3'NCR <i>acuE</i>  | AFUA_6G03540 | GCTCTGAACGATATGCTCCC<br>ACTGGGATGTGGTGCGGGGCGGAG               |
| 5'NCR <i>fcyB</i>  | AFUB_025700  | CAGAGAATTGCCAAGCTGGT<br>GTGGTGGGGATTGACTCAG                    |
| 3' NCR <i>fcyB</i> | AFUB_025700  | TGCGGTTTTTGGGTTTTATC<br>AGACCGTTGTTTCATACCGC                   |

**Table S4:** Absolute values of experiments presented in Figure 2. The TAFC content of the supernatant was normalized to g biomass, the ferricrocin content of the mycelia was normalized to 80 mg.

|                              | Strain        | Biomass (g)<br>-Fe | Biomass (g)<br>+Fe | TAFC<br>(Abs/g) | Ferricrocin<br>(Abs/80mg) |
|------------------------------|---------------|--------------------|--------------------|-----------------|---------------------------|
| Gln                          | wt            | 0.079              | 0.335              | 0.570           | 0.103                     |
|                              |               | 0.080              | 0.289              | 0.525           | 0.100                     |
|                              |               | 0.077              | 0.336              | 0.558           | 0.099                     |
|                              | $\Delta acuM$ | 0.056              | 0.202              | 0.268           | 0.073                     |
|                              |               | 0.064              | 0.174              | 0.234           | 0.071                     |
|                              |               | 0.061              | 0.147              | 0.262           | 0.075                     |
|                              | $\Delta acuK$ | 0.071              | 0.25               | 0.324           | 0.064                     |
|                              |               | 0.068              | 0.182              | 0.353           | 0.075                     |
|                              |               | 0.070              | 0.183              | 0.386           | 0.072                     |
| NH <sub>4</sub> <sup>+</sup> | wt            | 0.077              | 0.155              | 0.545           | 0.110                     |
|                              |               | 0.078              | 0.167              | 0.462           | 0.096                     |
|                              |               | 0.086              | 0.158              | 0.523           | 0.117                     |
|                              | $\Delta acuM$ | 0.064              | 0.118              | 0.266           | 0.080                     |
|                              |               | 0.069              | 0.139              | 0.232           | 0.076                     |
|                              |               | 0.064              | 0.132              | 0.234           | 0.079                     |
|                              | $\Delta acuK$ | 0.064              | 0.121              | 0.278           | 0.071                     |
|                              |               | 0.063              | 0.138              | 0.222           | 0.080                     |
|                              |               | 0.067              | 0.136              | 0.228           | 0.073                     |

**Table S5:** Absolute values of experiments presented in Figure 5. The TAFC content of the supernatant was normalized to g biomass, the ferricrocin content of the mycelia was normalized to 80 mg.

|                 | Strain       | Glucose         |                 |              |                        | Fructose        |                 |              |                        |
|-----------------|--------------|-----------------|-----------------|--------------|------------------------|-----------------|-----------------|--------------|------------------------|
|                 |              | Biomass (g) -Fe | Biomass (g) +Fe | TAFC (Abs/g) | Ferricrocin (Abs/80mg) | Biomass (g) -Fe | Biomass (g) +Fe | TAFC (Abs/g) | Ferricrocin (Abs/80mg) |
| <b>-Acetate</b> | wt           | 0.077           | 0.155           | 0.545        | 0.110                  | 0.067           | 0.14            | 0.343        | 0.039                  |
|                 |              | 0.078           | 0.167           | 0.462        | 0.096                  | 0.066           | 0.142           | 0.333        | 0.041                  |
|                 |              | 0.086           | 0.158           | 0.523        | 0.117                  | 0.069           | 0.143           | 0.333        | 0.040                  |
|                 | <i>ΔacuM</i> | 0.064           | 0.118           | 0.266        | 0.080                  | 0.055           | 0.11            | 0.236        | 0.037                  |
|                 |              | 0.069           | 0.139           | 0.232        | 0.076                  | 0.057           | 0.114           | 0.228        | 0.033                  |
|                 |              | 0.064           | 0.132           | 0.234        | 0.079                  | 0.056           | 0.113           | 0.214        | 0.032                  |
|                 | <i>ΔacuK</i> | 0.064           | 0.121           | 0.278        | 0.071                  | 0.058           | 0.113           | 0.207        | 0.033                  |
|                 |              | 0.063           | 0.138           | 0.222        | 0.080                  | 0.058           | 0.112           | 0.224        | 0.034                  |
|                 |              | 0.067           | 0.136           | 0.228        | 0.073                  | 0.057           | 0.116           | 0.211        | 0.032                  |
| <b>+Acetate</b> | wt           | 0.075           | 0.162           | 0.627        | 0.269                  | 0.068           | 0.141           | 0.397        | 0.064                  |
|                 |              | 0.080           | 0.166           | 0.413        | 0.272                  | 0.069           | 0.14            | 0.391        | 0.063                  |
|                 |              | 0.083           | 0.16            | 0.470        | 0.267                  | 0.068           | 0.144           | 0.412        | 0.060                  |
|                 | <i>ΔacuM</i> | 0.069           | 0.134           | 0.275        | 0.231                  | 0.058           | 0.134           | 0.293        | 0.068                  |
|                 |              | 0.068           | 0.143           | 0.338        | 0.221                  | 0.057           | 0.121           | 0.263        | 0.064                  |
|                 |              | 0.072           | 0.14            | 0.292        | 0.223                  | 0.059           | 0.13            | 0.271        | 0.066                  |
|                 | <i>ΔacuK</i> | 0.063           | 0.142           | 0.317        | 0.209                  | 0.057           | 0.126           | 0.281        | 0.063                  |
|                 |              | 0.067           | 0.139           | 0.343        | 0.207                  | 0.058           | 0.127           | 0.276        | 0.060                  |
|                 |              | 0.069           | 0.146           | 0.290        | 0.207                  | 0.062           | 0.128           | 0.290        | 0.066                  |



**Table S6:** Absolute values of experiments presented in Figure 8. The TAFC content of the supernatant was normalized to g biomass, the ferricrocin content of the mycelia was normalized to 80 mg.

|          | Strain        | Biomass (g)<br>-Fe | Biomass (g)<br>+Fe | TAFC<br>(Abs/g) | Ferricrocin<br>(Abs/80mg) |
|----------|---------------|--------------------|--------------------|-----------------|---------------------------|
| Glucose  | wt            | 0.072              | 0.189              | 0.444           | 0.099                     |
|          |               | 0.069              | 0.192              | 0.435           | 0.090                     |
|          |               | 0.069              | 0.193              | 0.435           | 0.097                     |
|          | $\Delta acuE$ | 0.073              | 0.196              | 0.438           | 0.099                     |
|          |               | 0.071              | 0.192              | 0.465           | 0.098                     |
|          |               | 0.072              | 0.195              | 0.417           | 0.094                     |
| Fructose | wt            | 0.072              | 0.152              | 0.389           | 0.065                     |
|          |               | 0.064              | 0.13               | 0.391           | 0.060                     |
|          |               | 0.069              | 0.145              | 0.406           | 0.061                     |
|          | $\Delta acuE$ | 0.069              | 0.141              | 0.377           | 0.061                     |
|          |               | 0.069              | 0.126              | 0.406           | 0.059                     |
|          |               | 0.068              | 0.135              | 0.397           | 0.064                     |

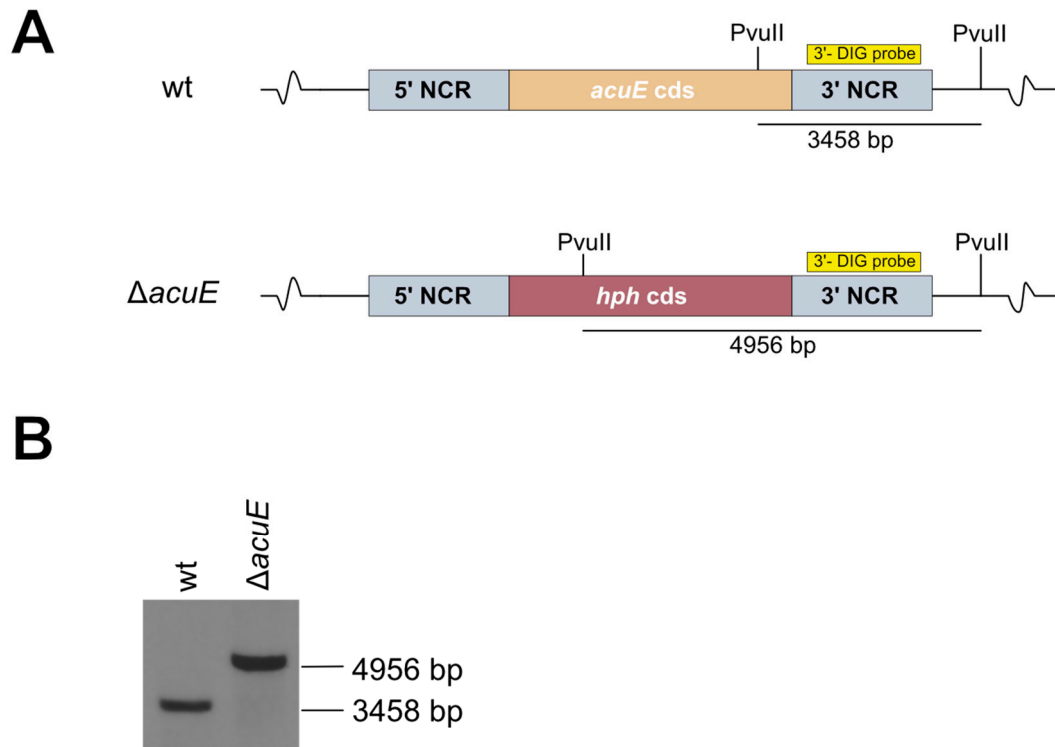

**Figure S1:** Scheme for deletion of *acuE* in *A. fumigatus* (A) and Southern blot analysis verification (B). Digestion with the restriction enzyme *PvuII* results in 3458-bp fragment in wt strain and a 4956-bp fragment in  $\Delta acuE$ . The hybridization probe labelled in A was generated from gDNA using primers PC50/PC51. NCR, non-coding region.

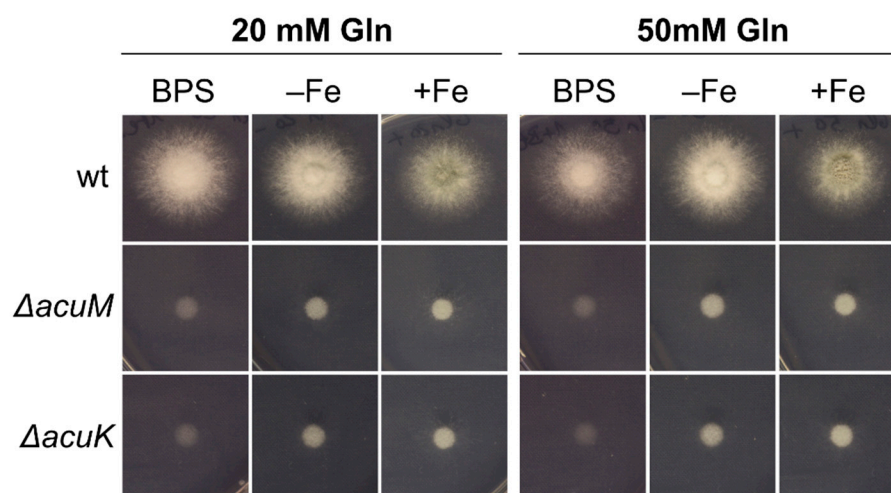

**Figure S2:** Mutants lacking either *AcuM* or *AcuK* are able to slightly use Gln as a carbon source. *Aspergillus fumigatus* wt and  $\Delta acuM$  and  $\Delta acuK$  mutant strains were point-inoculated using  $10^4$  spores on minimal medium using either Glc or acetate as carbon sources and Gln or  $\text{NH}_4^+$  as nitrogen sources. Experimental details are described in Figure 1.

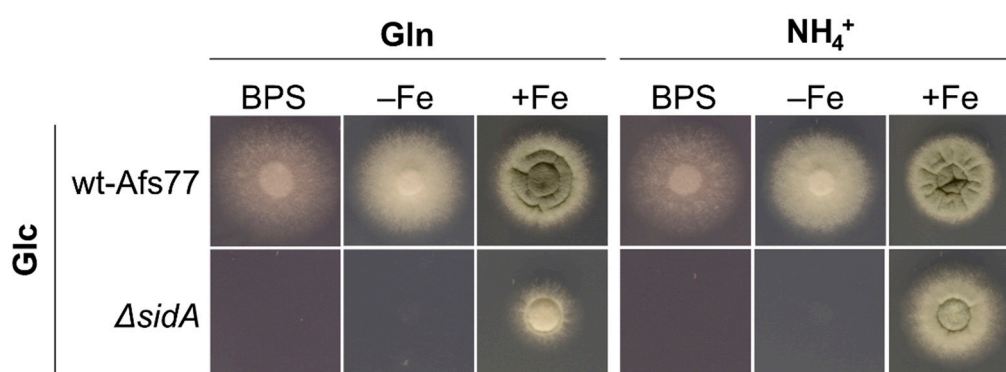

**Figure S3:** Siderophore-lacking  $\Delta sidA$  mutant displays a growth defect under both iron starvation (-Fe) and in the presence of BPS. *Aspergillus fumigatus* wt and  $\Delta sidA$  mutant strains were point-inoculated using  $10^4$  spores on minimal medium using either Glc or acetate as carbon sources and Gln or  $\text{NH}_4^+$  as nitrogen sources. Experimental details are described in Figure 1.

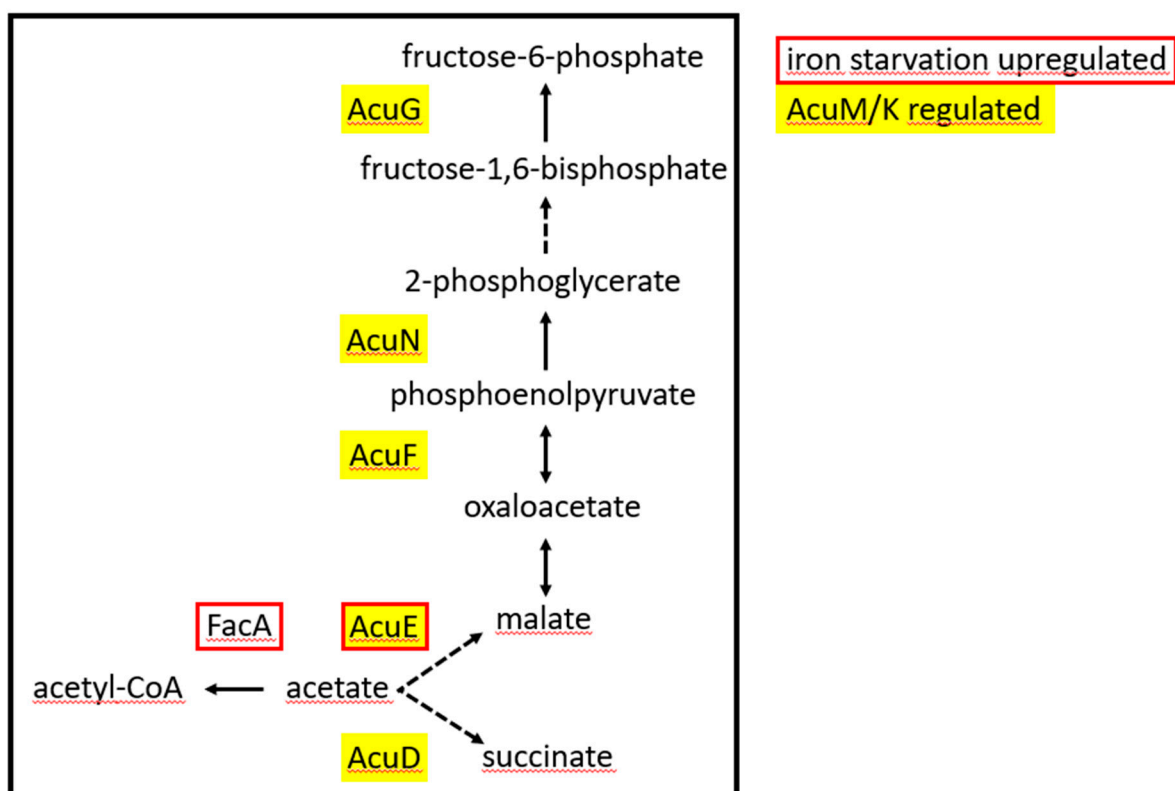

**Figure S4: Metabolic interaction of the enzymes encoded by the genes analyzed in Figure 6.** Upregulation of the encoding gene during iron limitation compared to iron sufficiency is marked by boxing in red; activation by AcuM and AcuK is marked in yellow
